# Supplementary material
Source: MDPI journal article supplement (https://www.mdpi.com/2071-1050/11/20/5792)
Supplement: s1 [file s1]

## **SURVEY ON FACTORS INFLUENCING TO SUSTAINABLE AFFORDABLE HOUSING CHOICE**

Dear Sir/ Madam,

We are conducting a research project on affordable housing in Nigeria. The aim of this current research is to evaluate factors that contribute to sustainable affordable housing choice (SAHC). The objective is to determine if the general opinion of the parties agrees with the opinion of each party. Specifically, if there is agreement between: affordable housing applicants' evaluation and the overall evaluation of all the parties, affordable housing residents' evaluation and overall evaluation of all the parties and residents of shanty towns' evaluation and overall evaluation of all the parties. The survey is voluntary, however we will be extremely grateful if you could spare a few minutes of your valuable time to complete this questionnaire form. Your feedback to this questionnaire is extremely important to explain the demand and supply side of affordable housing. All information is strictly confidential and will be solely used for academic research only. Thank you for your participation.

### **Section A: Background Information**

1. Gender:
  - Male
  - Female
2. Marital Status:
  - Married
  - Unmarried
3. Educational Qualification:
  - Diploma
  - Bsc
  - Msc
  - MBA
  - Phd
  - Other, please specify: \_\_\_\_\_
4. Nature of job:
  - Temporary
  - Permanent
  - Unemployment
  - Retirement
5. Family Income:
  - Below N100,000
  - N100,000-N200,000
  - N210,000-N300,000
  - N310,000-N400,000
  - N410,000-N500,000
  - Above N500,000
6. Number of family member:
  - 1-2 members
  - 3-6 members
  - More than 6 members

7. Type of house:
  - Terraced house
  - Apartment/ flats
  - Condominium
  - Other, please specify: \_\_\_\_\_
8. Age of house:
  - Less than 5 years
  - 5-10 years
  - 11-20 years
  - More than 20 years
9. Own vehicle(s):
  - Yes
  - No
10. Distance from house to recreation facilities:
  - Less than 2 Km
  - 2 Km- 5Km
  - More than 5 Km
11. Distance from house to health centres:
  - Less than 2 Km
  - 2 Km- 5Km
  - More than 5 Km
12. Distance from house to religious places:
  - Less than 2 Km
  - 2 Km- 5Km
  - More than 5 Km
13. Distance from house to educational centre:
  - Less than 2 Km
  - 2 Km- 5Km
  - More than 5 Km
14. Distance from house to child day care centre:
  - Less than 2 Km
  - 2 Km- 5Km
  - More than 5 Km
15. Distance from house to shopping mall or market:
  - Less than 2 Km
  - 2 Km- 5Km
  - More than 5 Km
16. Distance from house to working place:
  - Less than 2 Km
  - 2 Km- 5Km
  - More than 5 Km
17. Distance from house to public transportation station:
  - Less than 2 Km
  - 2 Km- 5Km
  - More than 5 Km

## **Section B: Survey Questions**

Please circle the level of severity of each factor, to indicate how it will influence your decision in making affordable housing choice. Scale of 1-5 as follow: 5= extremely severe; 4= very severe; 3= severe; 2= somewhat severe and 1= not severe.

| <b>Economic sustainability factors</b> |                                                                            |   |   |   |   |   |
|----------------------------------------|----------------------------------------------------------------------------|---|---|---|---|---|
| 1                                      | House price in relation to income (ESF01)                                  | 5 | 4 | 3 | 2 | 1 |
| 2                                      | Energy bill in relation to income (ESF02)                                  | 5 | 4 | 3 | 2 | 1 |
| 3                                      | Availability of mortgages and interest rates (ESF03)                       | 5 | 4 | 3 | 2 | 1 |
| 4                                      | Rental cost in relation to income (ESF04)                                  | 5 | 4 | 3 | 2 | 1 |
| 5                                      | Transportation cost in relation to income (ESF05)                          | 5 | 4 | 3 | 2 | 1 |
| 6                                      | Employment opportunities (ESF06)                                           | 5 | 4 | 3 | 2 | 1 |
| 7                                      | Taxation and Subsidy influences (ESF07)                                    | 5 | 4 | 3 | 2 | 1 |
| 8                                      | Household income level (ESF08)                                             | 5 | 4 | 3 | 2 | 1 |
| 9                                      | Tenure security (ESF09)                                                    | 5 | 4 | 3 | 2 | 1 |
| <b>Social Sustainability factors</b>   |                                                                            |   |   |   |   |   |
| 10                                     | Accessibility to working place (SSF01)                                     | 5 | 4 | 3 | 2 | 1 |
| 11                                     | Type of building e.g. Apartments, condominiums, semi-detached etc. (SSF02) | 5 | 4 | 3 | 2 | 1 |
| 12                                     | Housing quality/Adequacy e.g. meeting decent home standards (SSF03)        | 5 | 4 | 3 | 2 | 1 |
| 13                                     | Safety/Security (reduced incidence of crime) (SSF04)                       | 5 | 4 | 3 | 2 | 1 |
| 14                                     | Minimize social segregation (SSF05)                                        | 5 | 4 | 3 | 2 | 1 |
| 15                                     | Number of parking spaces (SSF06)                                           | 5 | 4 | 3 | 2 | 1 |
| 16                                     | Presence of lift or elevator (SSF07)                                       | 5 | 4 | 3 | 2 | 1 |
| 17                                     | Suitability/Appropriateness (SSF08)                                        | 5 | 4 | 3 | 2 | 1 |
| 18                                     | Access to recreational facilities e.g. Parks, green open spaces (SSF09)    | 5 | 4 | 3 | 2 | 1 |
| 19                                     | Effective maintenance and management of properties (SSF10)                 | 5 | 4 | 3 | 2 | 1 |
| 20                                     | Household size (SSF11)                                                     | 5 | 4 | 3 | 2 | 1 |
| 21                                     | Unit Size (SSF12)                                                          | 5 | 4 | 3 | 2 | 1 |
| 22                                     | Clean and Attractive (SSF13)                                               | 5 | 4 | 3 | 2 | 1 |
| 23                                     | Number of bedrooms (SSF14)                                                 | 5 | 4 | 3 | 2 | 1 |

|                                             |                                                                       |   |   |   |   |   |
|---------------------------------------------|-----------------------------------------------------------------------|---|---|---|---|---|
| 24                                          | Number of bathrooms (SSF15)                                           | 5 | 4 | 3 | 2 | 1 |
| 25                                          | Housing location e.g. City, countryside etc. (SSF16)                  | 5 | 4 | 3 | 2 | 1 |
| 26                                          | Access to recreational/Leisure facilities (SSF17)                     | 5 | 4 | 3 | 2 | 1 |
| 27                                          | Access to health facilities (SSF18)                                   | 5 | 4 | 3 | 2 | 1 |
| 28                                          | Access to religious places e.g. Temple, mosque, church etc. (SSF19)   | 5 | 4 | 3 | 2 | 1 |
| 29                                          | Access to educational centre e.g. School, tuition centre etc. (SSF20) | 5 | 4 | 3 | 2 | 1 |
| 30                                          | Access to child day care centre (SSF21)                               | 5 | 4 | 3 | 2 | 1 |
| 31                                          | Location of shopping mall or market (SSF22)                           | 5 | 4 | 3 | 2 | 1 |
| 32                                          | Availability of public transportation (SSF23)                         | 5 | 4 | 3 | 2 | 1 |
| 33                                          | Availability of power supply (Electricity) (SSF24)                    | 5 | 4 | 3 | 2 | 1 |
| 34                                          | Pipe borne water (SSF25)                                              | 5 | 4 | 3 | 2 | 1 |
| 35                                          | Major and Minor access road (SSF26)                                   | 5 | 4 | 3 | 2 | 1 |
| <b>Environmental Sustainability factors</b> |                                                                       |   |   |   |   |   |
| 36                                          | Air quality (ENSF01)                                                  | 5 | 4 | 3 | 2 | 1 |
| 37                                          | Efficient waste management (ENSF02)                                   | 5 | 4 | 3 | 2 | 1 |
| 38                                          | Use of appropriate materials (ENSF03)                                 | 5 | 4 | 3 | 2 | 1 |
| 39                                          | Thermal comfort e.g. presence of heating and cooling system (ENSF04)  | 5 | 4 | 3 | 2 | 1 |
| 40                                          | Energy efficiency (ENSF05)                                            | 5 | 4 | 3 | 2 | 1 |
| 41                                          | Noise pollution (ENSF06)                                              | 5 | 4 | 3 | 2 | 1 |
| 42                                          | Water pollution (ENSF07)                                              | 5 | 4 | 3 | 2 | 1 |
| 43                                          | Lighting quality e.g. Day lighting (ENSF08)                           | 5 | 4 | 3 | 2 | 1 |

|  | <b>Please list other factors that will affect your choice of a sustainable affordable house</b> | 5 | 4 | 3 | 2 | 1 |
|--|-------------------------------------------------------------------------------------------------|---|---|---|---|---|
|--|-------------------------------------------------------------------------------------------------|---|---|---|---|---|
